# Supplementary material for: Good's buffer derived highly emissive carbon quantum dots: excellent biocompatible anticancer drug carrier
Source: Royal Society of Chemistry journal article supplement (doi:10.1039/c6tb00081a), 2016-01-01
Supplement: c6tb00081a1.pdf [file c6tb00081a1.pdf]

**Supporting Information:**

**Good's Buffer Derived Highly Emissive Carbon Quantum Dots: Excellent Biocompatible Anticancer Drug Carrier**

**Aneeya K. Samantara,<sup>a,b</sup> Santanu Maji,<sup>c,d</sup>, Arnab Ghosh,<sup>e</sup> Bamaprasad Bag,<sup>a,b</sup> Rupesh Dash,<sup>c\*</sup> Bikash Kumar Jena<sup>a,b\*</sup>**

<sup>a</sup> CSIR-Institute of Minerals and Materials Technology, Bhubaneswar 751013, Odisha, India

<sup>b</sup> Academy of Scientific & Innovative Research (AcSIR), 2 Rafi Marg, New Delhi-110 001, India

<sup>c</sup> Institute of Life Sciences, Bhubaneswar 751023, Odisha, India

<sup>d</sup> Manipal University, Karnataka, India

<sup>e</sup> Institute of Physics, Bhubaneswar 751005, Odisha, India

\*Corresponding author: CSIR-Institute of Minerals and Materials Technology, Bhubaneswar 751013, Odisha, India; Institute of Life Sciences, Bhubaneswar 751023, Odisha, India

Email: [bikash@immt.res.in](mailto:bikash@immt.res.in); [rupesh.dash@gmail.com](mailto:rupesh.dash@gmail.com)

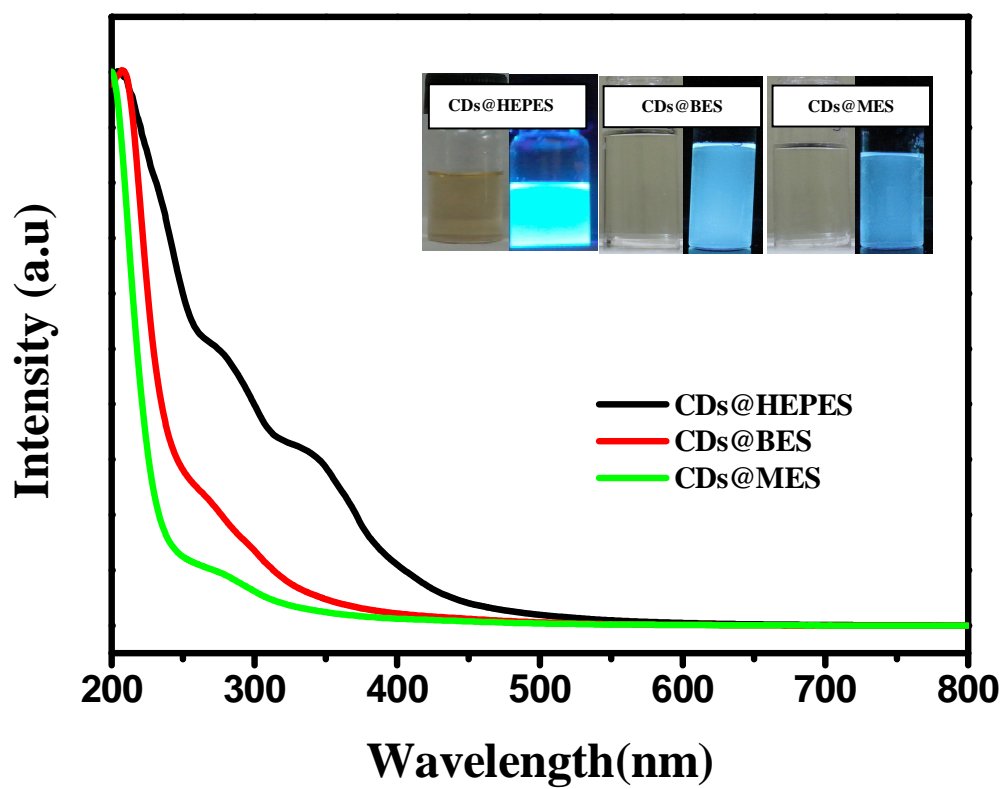

**Figure S1.** UV-Visible spectrum of CDs@HEPES CDs@MES and CDs@BES CDs. The inset is the optical photographs in absence and presence of UV light (365nm) irradiation.

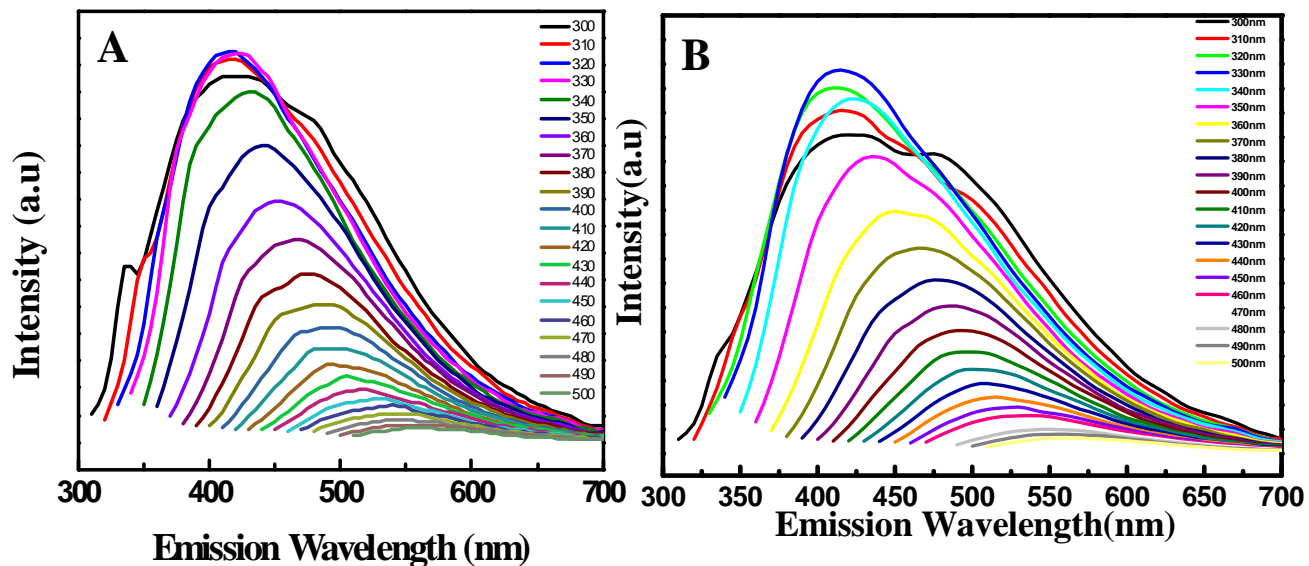

**Figure S2.** Photoluminescence emission spectrum ( $E_{ex}=300-500\text{nm}$ ) of (A) CDs@MES and (B) CDs@BES.

| Name      | PLQY (%) | Avg. Life Time(ns) |
|-----------|----------|--------------------|
| CDs@HEPES | 47.39    | 5.51               |
| CDs@MES   | 34.84    | 5.13               |
| CDs@BES   | 30.5     | 3.90               |

**Table 1.** Photoluminescence quantum yield and lime time decay of CDs@HEPES, CDs@MES and (B) CDs@BES.

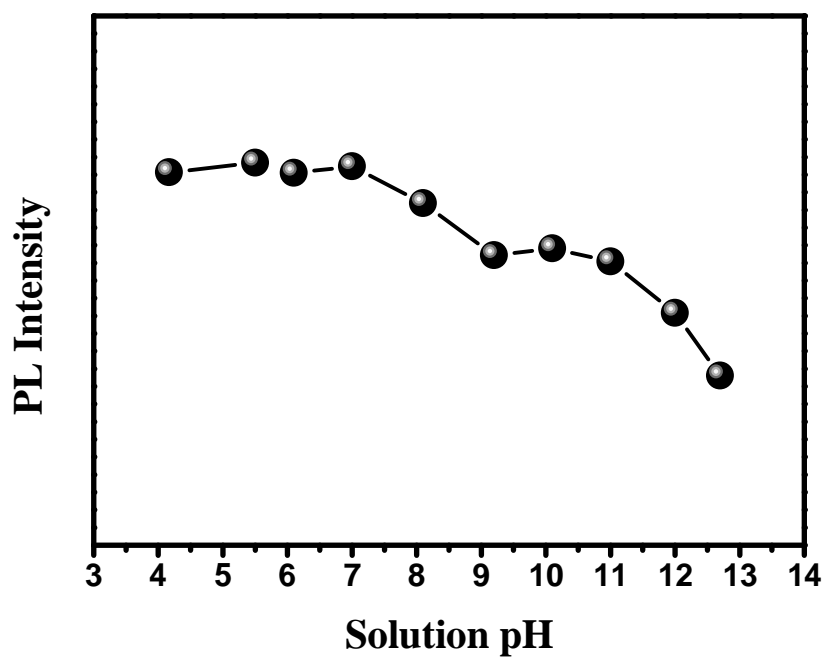

**Figure.S3** (A) Photoluminescence emission spectrum ( $E_{ex}=340\text{nm}$ ) at different pH (from 4 to 13) of CDs@HEPES.

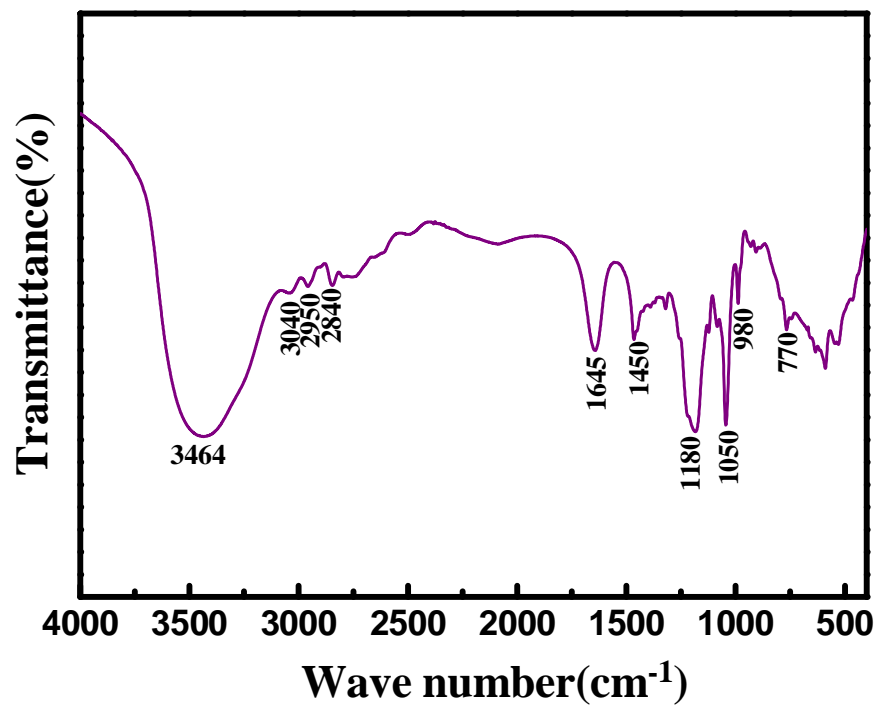

Figure.S4 FTIR spectrum of CDs@HEPES.

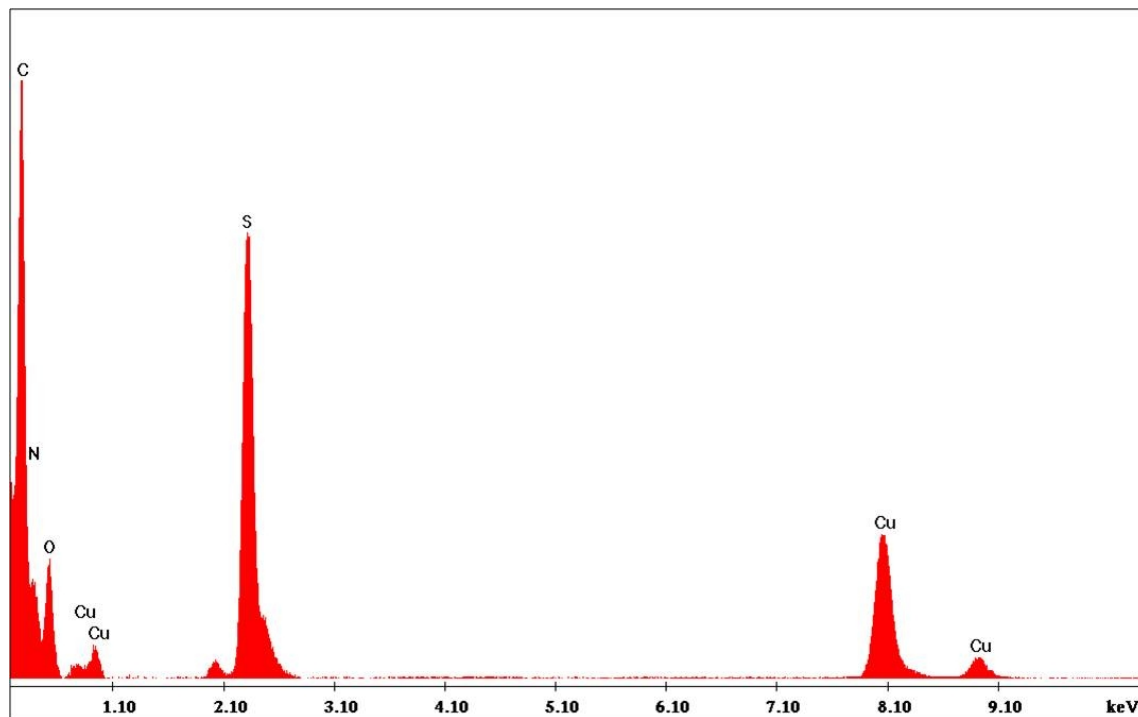

**Figure.S5** EDX spectra showing the elemental composition of CDs@HEPES

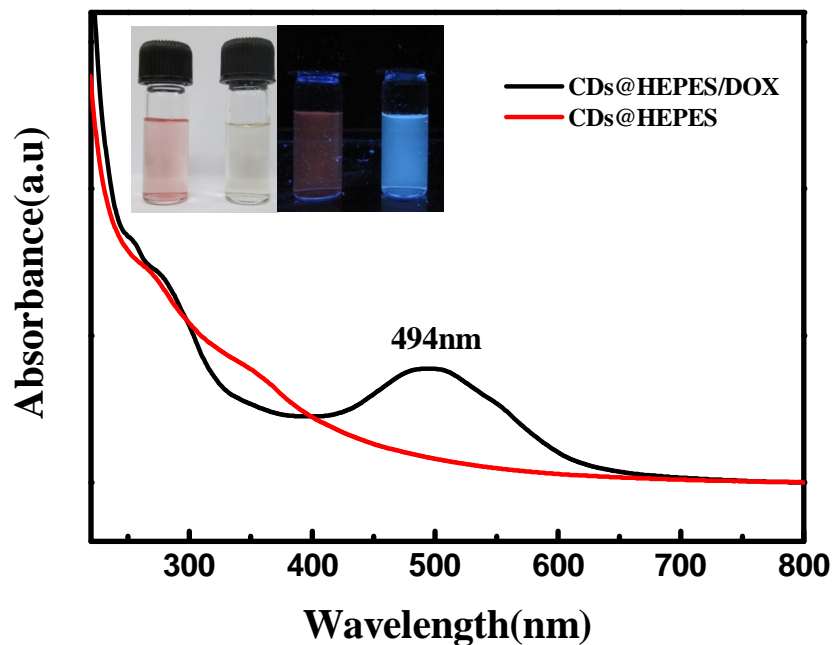

**Figure.S6** UV-Visible absorbance spectrum of CDs@HEPES and CDs@HEPES/DOX. Inset is the optical photograph of CDs@HEPES and CDs@HEPES/DOX in room light and 365nm UV-light illumination.

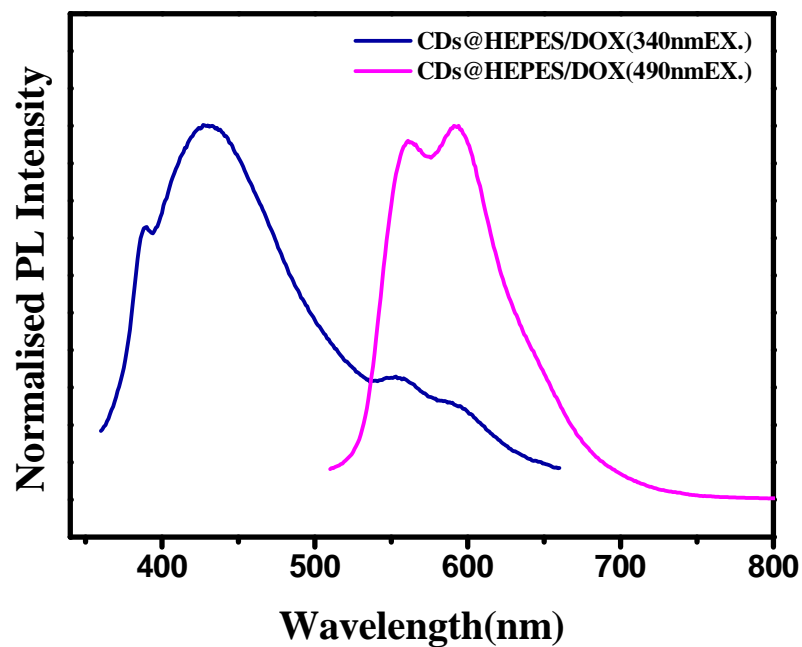

**Figure.S7** Normalised photoluminescence emission spectra of CDs@HEPES/DOX at 340nm and 490 nm excitation.
